# Supplementary material for: 68Ga-DOTATATE PET/CT imaging of indeterminate pulmonary nodules and lung cancer
Source: PubMed Central journal article supplement (PMC5300187; doi:10.1371/journal.pone.0171301), 2017-02-09
Supplement: pone.0171301.s002.pdf [file pone.0171301.s002.pdf]

## <sup>68</sup>Ga-DOTATATE PET/CT Imaging of Indeterminate Pulmonary Nodules and Lung Cancer

Ronald Walker,<sup>1,2,3</sup> Stephen Deppen,<sup>4</sup> Gary Smith,<sup>1,2</sup> Chanjuan Shi,<sup>5</sup> Jonathan Lehman,<sup>6</sup> Jeff Clanton,<sup>2</sup> Brandon Moore,<sup>1</sup> Rena Burns,<sup>3</sup> Eric L Grogan,<sup>4,7</sup> Pierre P Massion<sup>3,8,9\*</sup>

### **Affiliations:**

<sup>1</sup>Medical Imaging Service, Tennessee Valley VA Healthcare System, Nashville, TN, United States of America

<sup>2</sup>Department of Radiology and Radiological Sciences, Vanderbilt University Medical Center, Nashville, TN, United States of America

<sup>3</sup>Vanderbilt-Ingram Cancer Center, Nashville, TN, United States of America

<sup>4</sup>Department of Surgery, Vanderbilt University Medical Center, Nashville, TN, United States of America

<sup>5</sup>Department of Pathology, Microbiology and Immunology, Vanderbilt University Medical Center, Nashville, TN, United States of America

<sup>6</sup>Department of Medicine, Division of Hematology/Oncology, Vanderbilt University Medical Center, Nashville, TN, United States of America

<sup>7</sup>Department of Surgery, Tennessee Valley Healthcare System, Nashville, TN, United States of America

<sup>8</sup>Department of Medicine, Division of Pulmonary, Allergy and Critical Care Medicine, Vanderbilt University Medical Center, Nashville, TN, United States of America

<sup>9</sup>Pulmonary Critical Care Section, Medical Service, Tennessee Valley Healthcare System, Nashville, TN, United States of America

**Running title:** <sup>68</sup>Ga-DOTATATE - Lung Nodules & Cancer

\*Corresponding author

Email: pierre.massion@vanderbilt.edu

**Key words:** <sup>68</sup>Ga-DOTATATE; lung cancer; lung nodule; somatostatin receptor

**Word count:** 5842

| Subj ID | Lesion diameter (cm) | <sup>18</sup> F-FDG SUVMAX | <sup>68</sup> Ga-DOTATATE SUVMAX | Age (y) | Fasting blood sugar mg/dL | Diagnosis  | Cancer | Pet pos | dota pos | pet right | dota right | Gender F = 1 M = 0 | Ethnicity Caucasian = 1 | Details                                                                                                                       |
|---------|----------------------|----------------------------|----------------------------------|---------|---------------------------|------------|--------|---------|----------|-----------|------------|--------------------|-------------------------|-------------------------------------------------------------------------------------------------------------------------------|
| 2       | 1.6                  | 1.0                        | 0.4                              | 60      | 267                       | Benign     | 0      | 0       | 0        | 1         | 1          | 0                  | 1                       | biopsy - fibrosis and necrosis, neg. for malignant cells                                                                      |
| 183     | 1.0                  | 0.5                        | 0.5                              | 49      | 92                        | Benign     | 0      | 0       | 0        | 1         | 1          | 0                  | 1                       | Benign granuloma via follow-up imaging results.                                                                               |
| 25      | 1.5                  | 4.5                        | 0.6                              | 79      | 104                       | Metastatic | 1      | 1       | 0        | 1         | 0          | 0                  | 1                       | RML-malignant cells present, consistent with metastatic urothelial carcinoma (patient had urothelial carcinoma 10 y ago)      |
| 218     | 1.5                  | 0.7                        | 0.8                              | > 80    | 107                       | Benign     | 0      | 0       | 0        | 1         | 1          | 0                  | 1                       | Benign granuloma, but had microscopic focus of bronchus-associated lymphoid tissue (BALT) lymphoma                            |
| 109     | 3.9                  | 1.2                        | 0.8                              | 40      | 97                        | Benign     | 0      | 0       | 0        | 1         | 1          | 0                  | 1                       | endobronchial biopsy -chronic inflammation, negative for tumor or granuloma, broncholith noted in bronchoscopy report         |
| 93      | 2.0                  | 1.3                        | 0.8                              | 68      | 109                       | Benign     | 0      | 0       | 0        | 1         | 1          | 0                  | 1                       | rare fungal yeasts, consistent with histoplasmosis, negative for malignant cells                                              |
| 182     | 1.0                  | 1.4                        | 0.8                              | 46      | 104                       | Benign     | 0      | 0       | 0        | 1         | 1          | 0                  | 1                       | nodules stable by 2 y CT imaging. No cytology obtained                                                                        |
| 138     | 2.2                  | 5.2                        | 0.8                              | 50      | 112                       | ADC        | 1      | 1       | 0        | 1         | 0          | 0                  | 1                       | LUL-moderately to poorly differentiated adenocarcinoma                                                                        |
| 3       | 1.5                  | 1.3                        | 0.9                              | 46      | 124                       | Benign     | 0      | 0       | 0        | 1         | 1          | 0                  | 1                       | Pulm nodules stable by 2 y follow-up CT imaging, no cytology reports                                                          |
| 120     | 2.0                  | 5.8                        | 0.9                              | 53      | 125                       | Benign     | 0      | 1       | 0        | 0         | 1          | 0                  | 1                       | Two nodules - this one RUL - negative for malignant cells via CT biopsy and on more than 2 y CT follow-up                     |
| 120     | 3.0                  | 0.9                        | 1.2                              | 53      | 125                       | Benign     | 0      | 1       | 0        | 0         | 1          | 0                  | 1                       | Two nodules - this one RLL - negative for malignant cells via CT biopsy and on more than 2 y CT follow-up                     |
| 179     | 1.1                  | 0.7                        | 1.0                              | 63      | 116                       | Benign     | 0      | 0       | 0        | 1         | 1          | 0                  | 1                       | patient declined biopsy and elected CT follow-up. Nodule was stable on 2 year follow-up by CT.                                |
| 70      | 1.2                  | 1.9                        | 1.0                              | 46      | 103                       | Benign     | 0      | 0       | 0        | 1         | 1          | 0                  | 1                       | patient declined biopsy and elected CT follow-up. Nodule was stable on 2 year follow-up by CT.                                |
| 192     | 4.4                  | 2.3                        | 1.0                              | 62      | 108                       | ADC        | 1      | 0       | 0        | 0         | 0          | 0                  | 1                       | RUL well-differentiated adenocarcinoma with mucinous features                                                                 |
| 129     | 1.4                  | 0.8                        | 1.2                              | 64      | 104                       | Benign     | 0      | 0       | 0        | 1         | 1          | 1                  | 1                       | RUL wedge resection - 1.5 cm dense fibrotic scar tissue - dense fibrosis, negative for malignancy, via final pathology report |
| 70      | 2.4                  | 0.8                        | 1.2                              | 46      | 103                       | Benign     | 0      | 0       | 0        | 1         | 1          | 0                  | 1                       | patient declined biopsy and elected CT follow-up. Nodule was stable on 2 year follow-up by CT.                                |
| 95      | 4.1                  | 3.5                        | 1.2                              | 57      | 97                        | Benign     | 0      | 1       | 0        | 0         | 1          | 0                  | 1                       | CT-guided FNA and core biopsy negative for malignant cells, nodule unchanged on 2 year CT follow-up                           |
| 186     | 1.8                  | 5.1                        | 1.3                              | 70      | 98                        | ADC        | 1      | 1       | 0        | 1         | 0          | 0                  | 1                       | NSCLC, favor adenocarcinoma                                                                                                   |
| 76      | 1.0                  | 2.2                        | 1.4                              | 72      | 89                        | Benign     | 0      | 0       | 0        | 1         | 1          | 0                  | 1                       | bronchoscopic biopsy negative for malignant cells                                                                             |
| 146     | 6.9                  | 15.0                       | 1.5                              | 63      | 101                       | ADC        | 1      | 1       | 1        | 1         | 1          | 0                  | 1                       | right middle lobe adenocarcinoma by pathologic diagnosis                                                                      |
| 137     | 5.5                  | 6.5                        | 1.6                              | 65      | 130                       | ADC        | 1      | 1       | 1        | 1         | 1          | 0                  | 1                       | right lower lobe - moderately differentiated adenocarcinoma by pathologic diagnosis                                           |
| 162     | 3.2                  | 5.6                        | 1.8                              | 67      | 241                       | SCC        | 1      | 1       | 1        | 1         | 1          | 0                  | 1                       | squamous cell carcinoma by tissue diagnosis                                                                                   |
| 68      | 7.0                  | 6.1                        | 1.9                              | 60      | 88                        | Benign     | 0      | 1       | 1        | 0         | 0          | 0                  | 1                       | benign fibrosis by tissue diagnosis                                                                                           |
| 153     | 3.8                  | 5.1                        | 2.1                              | 73      | 102                       | ADC        | 1      | 1       | 1        | 1         | 1          | 0                  | 1                       | poorly differentiated adenocarcinoma via core biopsy                                                                          |
| 191     | 7.0                  | 11.2                       | 2.1                              | 62      | 88                        | SCC        | 1      | 1       | 1        | 1         | 1          | 0                  | 1                       | squamous cell carcinoma by tissue diagnosis, right lower lobe                                                                 |
| 40      | 2.3                  | 5.0                        | 2.5                              | 78      | 136                       | SCC        | 1      | 1       | 1        | 1         | 1          | 0                  | 1                       | CT-guided fine needle aspiration and 4 core biopsies - poorly differentiated NSCLC - probably squamous cell carcinoma         |
| 204     | 3.1                  | 15.3                       | 2.5                              | 65      | 141                       | SCC        | 1      | 1       | 1        | 1         | 1          | 0                  | 1                       | NSCOC - poorly differentiated squamous cell carcinoma                                                                         |
| 164     | 1.5                  | 9.7                        | 2.6                              | 64      | 110                       | ADC        | 1      | 1       | 1        | 1         | 1          | 0                  | 1                       | adenocarcinoma of the right upper lobe                                                                                        |
| 100     | 2.1                  | 13.9                       | 3.2                              | 65      | 71                        | SCC        | 1      | 1       | 1        | 1         | 1          | 0                  | 1                       | squamous cell carcinoma of the right upper lobe                                                                               |
| 101     | 3.1                  | 3.7                        | 3.4                              | 59      | 93                        | SCC        | 1      | 1       | 1        | 1         | 1          | 0                  | 1                       | squamous cell carcinoma of the left lower lobe, moderately differentiated                                                     |
| 85      | 6.0                  | 13.6                       | 3.8                              | 72      | 112                       | SCC        | 1      | 1       | 1        | 1         | 1          | 0                  | 1                       | squamous cell carcinoma of the right upper lobe                                                                               |
| total   |                      |                            |                                  |         |                           |            | 15     | 18      | 12       | 26        | 26         | 1                  | 31                      |                                                                                                                               |

ADC = adenocarcinoma of the lung. SCC = squamous cell lung cancer. Metastatic = a metastatic lung nodule from urinary bladder cancer.
